# Supplementary material for: Statins and Hip Fracture Prevention – A Population Based Cohort Study in Women
Source: PubMed Central journal article supplement (PMC3483280; doi:10.1371/journal.pone.0048095), 2012-10-29
Supplement: pone.0048095.s001.pdf [file pone.0048095.s001.pdf]

**Table S1.** Selected characteristics of the persons within the statin cohort.

|                                                                           | Persons with poor* adherence |         | Persons with good† adherence |         |
|---------------------------------------------------------------------------|------------------------------|---------|------------------------------|---------|
|                                                                           | N (%)                        |         | N (%)                        |         |
| <b>Age at cohort entry</b>                                                |                              |         |                              |         |
| 45-55                                                                     | 9940                         | (29.10) | 8428                         | (20.94) |
| 56-65                                                                     | 13128                        | (38.44) | 16128                        | (40.07) |
| 66-75                                                                     | 11085                        | (32.46) | 15698                        | (39.00) |
| <b>Year of the cohort entry</b>                                           |                              |         |                              |         |
| 1996                                                                      | 3787                         | (11.09) | 4066                         | (10.1)  |
| 1997                                                                      | 4606                         | (13.49) | 5013                         | (12.45) |
| 1998                                                                      | 4874                         | (14.27) | 5986                         | (14.87) |
| 1999                                                                      | 6315                         | (18.49) | 7737                         | (19.22) |
| 2000                                                                      | 7395                         | (21.65) | 9116                         | (22.65) |
| 2001                                                                      | 7176                         | (21.01) | 8336                         | (20.71) |
| <b>365 days prior to the cohort entry use of</b>                          |                              |         |                              |         |
| Beta blocking agents                                                      | 12343                        | (36.14) | 16299                        | (40.49) |
| Hormone replacement therapy                                               | 10627                        | (31.12) | 12674                        | (31.49) |
| Diuretics                                                                 | 6813                         | (19.95) | 9067                         | (22.52) |
| Thiazides (alone or in combination preparations)                          | 6965                         | (20.39) | 8887                         | (22.08) |
| Angiotensin-converting enzyme inhibitors or angiotensin receptor blockers | 6756                         | (19.78) | 8749                         | (21.73) |
| Calcium channel blockers                                                  | 5558                         | (16.27) | 7478                         | (18.58) |
| Diabetes drug                                                             | 3439                         | (10.07) | 5111                         | (12.7)  |
| Inhaled corticosteroids                                                   | 2393                         | (7.01)  | 2917                         | (7.25)  |
| Bisphosphonates acting through mevalonate pathway‡                        | 344                          | (1.01)  | 468                          | (1.16)  |
| <b>Any time prior to the cohort entry evidence of¥</b>                    |                              |         |                              |         |
| Coronary artery disease                                                   | 4816                         | (14.1)  | 8072                         | (20.05) |
| Rheumatoid arthritis                                                      | 1152                         | (3.37)  | 1262                         | (3.14)  |
| Cardiac insufficiency                                                     | 1108                         | (3.24)  | 1659                         | (4.12)  |
| Cardiac arrhythmias                                                       | 669                          | (1.96)  | 923                          | (2.29)  |
| Epilepsy                                                                  | 343                          | (1)     | 450                          | (1.12)  |
| Parkinsonism                                                              | 73                           | (0.21)  | 106                          | (0.26)  |

\*Poor adherence=prescribed days statins covered <40% of the 5-year exposure period.

†Good adherence=prescribed days statins covered ≥80% of the 5-year exposure period and at least 3 purchased statin prescriptions in each year.

‡Pamidronic acid, alendronic acid, ibandronic acid, risedronic acid, zoledronic acid, risedronic acid in combination preparation with calcium, or risedronic acid with calcium and cholecalciferol

¥As indicated in the Special Reimbursement Register of the Social Insurance Institution in Finland
