# Supplementary material for: Statins and Hip Fracture Prevention – A Population Based Cohort Study in Women
Source: PubMed Central journal article supplement (PMC3483280; doi:10.1371/journal.pone.0048095), 2012-10-29
Supplement: pone.0048095.s002.pdf [file pone.0048095.s002.pdf]

**Table S2.** Characteristics of the persons in the study cohorts.

|                                                                                                                                                                      | <b>Statin<br/>No (%)<br/>(n=40254)</b> | <b>Hypertension<br/>No (%)<br/>(n=41610)</b> | <b>Population<br/>No (%)<br/>(n=62585)</b> |
|----------------------------------------------------------------------------------------------------------------------------------------------------------------------|----------------------------------------|----------------------------------------------|--------------------------------------------|
| <b>During the exposure period</b>                                                                                                                                    |                                        |                                              |                                            |
| Alcohol-related hospitalisation                                                                                                                                      | 4 (0.01)                               | 11 (0.03)                                    | 16 (0.03)                                  |
| Use of bisphosphonates (mevalonate pathway)*                                                                                                                         | 2226 (5.53)                            | 2004 (4.82)                                  | 1833 (2.93)                                |
| Insulin and other blood glucose lowering drugs                                                                                                                       | 7393 (18.37)                           | 4021 (9.66)                                  | 2239 (3.58)                                |
| Diuretics                                                                                                                                                            | 10666 (26.50)                          | 12832 (30.84)                                | 5632 (9.00)                                |
| Beta blocking agents                                                                                                                                                 | 21815 (54.19)                          | 23684 (56.92)                                | 9765 (15.60)                               |
| Calcium channel blockers                                                                                                                                             | 9751 (24.22)                           | 11165 (26.83)                                | 4260 (6.81)                                |
| Angiotensin-converting enzyme inhibitors or angiotensin receptor blockers                                                                                            | 15383 (38.17)                          | 20325 (48.85)                                | 7736 (12.36)                               |
| <b>During the 365 days prior to the follow-up</b>                                                                                                                    |                                        |                                              |                                            |
| Use of antipsychotics, anxiolytics, hypnotics, sedatives, non-selective monoamine-reuptake inhibitors, monoamine oxidase type A inhibitors, or other antidepressants | 9770 (24.27)                           | 9034 (21.71)                                 | 8390 (13.41)                               |

\* Pamidronic acid, alendronic acid, ibandronic acid, risedronic acid, zoledronic acid, risendronic acid in combination preparation with calcium, or risedronic acid with calcium and cholecalciferol
